# Supplementary material
Source: PubMed Central journal article supplement (PMC9989958)
Supplement: jama-e232487-s002.pdf [file jama-e232487-s002.pdf]

## Supplemental Online Content

Hong SJ, Lee YJ, Lee SJ, et al; LODESTAR Investigators. Treat-to-target or high-intensity statin in patients with coronary artery disease: a randomized clinical trial. *JAMA*. doi:10.1001/jama.2023.2487

**eAppendix.** Supplementary Methods for Definition of Secondary Endpoints

**eTable 1.** Inclusion and Exclusion Criteria

**eTable 2.** Changes in Statin Intensity in the Treat-to-Target Strategy Group

**eTable 3.** Statin Intensity Between Groups

**eTable 4.** Lipid-Lowering Therapy

**eTable 5.** Cardiovascular Medications

**eTable 6.** Serial Changes in Lipid Profiles

**eTable 7.** Patients With LDL-C Below 70 mg/dL

**eTable 8.** Patients Excluded From The Per-Protocol Population

**eTable 9.** Primary and Secondary Endpoints in the Per-Protocol Population

**eTable 10.** Reasons for Discontinuing Statin Therapy by Adverse Effect

**eFigure 1.** Lipid Profile During Study Period

**eFigure 2.** Treatment Difference for the Primary Endpoint

**eFigure 3.** Subgroup Analyses for the Primary Endpoint

This supplemental material has been provided by the authors to give readers additional information about their work.

## **eAppendix. Supplementary methods for definition of secondary endpoints**

New-onset diabetes mellitus was defined as a fasting plasma glucose level  $\geq 126$  mg/dL or new initiation of antidiabetic drugs.<sup>1,2</sup> Hospitalization due to heart failure was defined as a hospitalization requiring at least an overnight stay in the hospital due to substantial worsening of heart failure symptoms or signs requiring the augmentation of oral drugs or the new administration of intravenous heart failure therapy, including diuretics, inotropes, or vasodilators.<sup>3</sup> Deep vein thrombosis was diagnosed when thrombi in deep veins of the lower extremity were found by imaging studies such as compression ultrasonography or computed tomography.<sup>4</sup> Pulmonary thromboembolism was defined as the appearance of a thrombus in the pulmonary arteries in a ventilation-perfusion lung scan, pulmonary angiography, or computed tomography.<sup>4</sup> Aortic intervention or surgery involved any endovascular procedure or surgery to treat aorta disease. End stage kidney disease was defined as stage 5 according to the National Kidney Foundation Kidney Disease Outcomes Quality Initiative classification of chronic kidney disease or disease requiring dialysis, irrespective of the glomerular filtration rate.<sup>5</sup> The composite of laboratory abnormalities considered elevation in aminotransferase ( $>$ baseline level and  $>3$  times the upper limit of reference), creatine kinase ( $>$ baseline level and  $>5$  times the upper limit of reference), and creatinine levels ( $>50\%$  increase from baseline level and greater than the upper limit of reference). In this study, a composite of new-onset diabetes mellitus, aminotransferase or creatine kinase elevation, or end-stage kidney disease was also assessed as a post hoc.

### References

1. American Diabetes Association. (2) Classification and diagnosis of diabetes. *Diabetes Care* 2015;38 Suppl:S8-S16.
2. Dormuth CR, Fillion KB, Paterson JM, et al. Higher potency statins and the risk of new diabetes: multicentre, observational study of administrative databases. *BMJ* 2014;348:g3244.
3. Zannad F, Garcia AA, Anker SD, et al. Clinical outcome endpoints in heart failure trials: a European Society of Cardiology Heart Failure Association consensus document. *Eur J Heart Fail* 2013;15(10):1082-1094.
4. Baglin T, Luddington R, Brown K, Baglin C. Incidence of recurrent venous thromboembolism in relation to clinical and thrombophilic risk factors: prospective cohort study. *Lancet* 2003;362(9383):523-526.
5. Levin A, Stevens PE. Summary of KDIGO 2012 CKD guideline: behind the scenes, need for guidance, and a framework for moving forward. *Kidney Int* 2014;85(1):49-61.

**eTable 1. Inclusion and exclusion criteria**

---

**Inclusion Criteria**

- Patients  $\geq 19$  years old
- Patients clinically diagnosed with coronary artery disease: stable angina, unstable angina, acute non-ST elevation myocardial infarction, and acute ST elevation myocardial infarction
- Patients with signed informed consent

**Exclusion Criteria**

- Pregnant women or women with potential childbearing during the study period
  - Patients with severe adverse events or hypersensitive to statin
  - Patients receiving drug that interacts with statin (strong inhibitor of cytochrome p-450 3A4 or 2C9)
  - Patients with risk factors for myopathy, hereditary muscle disorder, hypothyroidism, alcohol use disorder, severe hepatic dysfunction (3 times the normal reference values), or rhabdomyolysis
  - Life expectancy  $< 3$  years
  - Patients who could not be followed for more than 1 year
  - Patients who could not understand the consent form
-

**eTable 2. Changes in statin intensity in the treat-to-target strategy group**

|                                         | <b>Overall study period</b> | <b>Initial – 3 months</b> | <b>3 months – 6 months</b> | <b>6 months – 1 year</b> | <b>1 year – 2 years</b> | <b>2 years – 3 years</b> |
|-----------------------------------------|-----------------------------|---------------------------|----------------------------|--------------------------|-------------------------|--------------------------|
| <b>Total number of patients</b>         | <b>2200</b>                 | <b>2200</b>               | <b>2182</b>                | <b>2177</b>              | <b>2164</b>             | <b>2137</b>              |
| <b>Up-titration</b>                     | <b>378 (17)</b>             |                           |                            |                          |                         |                          |
| Low-intensity to moderate-intensity     | 3 (<1)                      | 2 (<1)                    | 3 (<1)                     | 3 (<1)                   | 4 (<1)                  | 0                        |
| Moderate-intensity to high-intensity    | 375 (17)                    | 219 (10)                  | 67 (3)                     | 109 (5)                  | 72 (33)                 | 16 (1)                   |
| <b>Without intensity changes</b>        | <b>1614 (73)</b>            |                           |                            |                          |                         |                          |
| Low-intensity statin maintenance        | 2 (<1)                      | 3 (<1)                    | 10 (1)                     | 11 (<1)                  | 21 (1)                  | 26 (1)                   |
| Moderate-intensity statin maintenance   | 765 (35)                    | 947 (43)                  | 950 (44)                   | 869 (40)                 | 828 (38)                | 894 (42)                 |
| High-intensity statin maintenance       | 847 (39)                    | 927 (42)                  | 1083 (50)                  | 1107 (51)                | 1149 (53)               | 1151 (54)                |
| <b>Down-titration</b>                   | <b>208 (9)</b>              |                           |                            |                          |                         |                          |
| High-intensity to moderate-intensity    | 179 (8)                     | 92 (4)                    | 46 (2)                     | 14 (1)                   | 53 (2)                  | 1 (<1)                   |
| High-intensity to low-intensity         | 3 (<1)                      | 3 (<1)                    | 0                          | 0                        | 1 (<1)                  | 0                        |
| Moderate-intensity to low-intensity     | 26 (1)                      | 7 (<1)                    | 5 (<1)                     | 41 (2)                   | 4 (<1)                  | 0                        |
| <b>No maintenance of statin therapy</b> | <b>–</b>                    | <b>–</b>                  | <b>18 (1)</b>              | <b>23 (1)</b>            | <b>32 (2)</b>           | <b>49 (2)</b>            |

Data are numbers (percentages). When patients underwent  $\geq 2$  intensity changes for a given period, the initial and final intensity were considered as the overall change in statin intensity.

**eTable 3. Statin intensity between groups**

|                                                    | Treat-to-target | High-intensity statin |
|----------------------------------------------------|-----------------|-----------------------|
| <b>Total person-years of follow-up<sup>a</sup></b> | <b>6449</b>     | <b>6461</b>           |
| None                                               | 79 (1)          | 96 (1)                |
| Low-intensity statin                               | 63 (<1)         | 10 (<1)               |
| Moderate-intensity statin                          | 2795 (43)       | 405 (6)               |
| High-intensity statin                              | 3512 (54)       | 5950 (92)             |
| <b>0 – 6 weeks</b>                                 |                 |                       |
| Number of patients                                 | 2200            | 2200                  |
| Low-intensity statin                               | 5 (<1)          | 0                     |
| Moderate-intensity statin                          | 1173 (53)       | 24 (1)                |
| High-intensity statin                              | 1022 (47)       | 2176 (99)             |
| <b>6 week – 3 months</b>                           |                 |                       |
| Number of patients                                 | 2187            | 2187                  |
| None                                               | 14 (1)          | 16 (1)                |
| Low-intensity statin                               | 10 (1)          | 2 (<1)                |
| Moderate-intensity statin                          | 1047 (48)       | 70 (3)                |
| High-intensity statin                              | 1116 (51)       | 2099 (96)             |
| <b>3 months – 6 months</b>                         |                 |                       |
| Number of patients                                 | 2182            | 2184                  |
| None                                               | 25 (1)          | 25 (1)                |
| Low-intensity statin                               | 13 (1)          | 3 (<1)                |
| Moderate-intensity statin                          | 1019 (47)       | 76 (4)                |
| High-intensity statin                              | 1125 (52)       | 2080 (95)             |
| <b>6 months – 1 year</b>                           |                 |                       |
| Number of patients                                 | 2177            | 2182                  |
| None                                               | 30 (1)          | 43 (2)                |
| Low-intensity statin                               | 14 (1)          | 4 (<1)                |
| Moderate-intensity statin                          | 989 (45)        | 99 (5)                |
| High-intensity statin                              | 1144 (53)       | 2036 (93)             |
| <b>1 year – 2 years</b>                            |                 |                       |
| Number of patients                                 | 2164            | 2166                  |
| None                                               | 42 (2)          | 44 (2)                |
| Low-intensity statin                               | 25 (1)          | 4 (<1)                |
| Moderate-intensity statin                          | 900 (42)        | 143 (7)               |
| High-intensity statin                              | 1197 (55)       | 1975 (91)             |
| <b>2 years – 3 years</b>                           |                 |                       |
| Number of patients                                 | 2137            | 2138                  |
| None                                               | 49 (2)          | 50 (2)                |
| Low-intensity statin                               | 26 (1)          | 3 (<1)                |
| Moderate-intensity statin                          | 868 (41)        | 182 (9)               |
| High-intensity statin                              | 1194 (56)       | 1903 (89)             |

<sup>a</sup> Data are presented as person-years (%) and others are numbers (percentages).

**eTable 4. Lipid-lowering therapy**

|                                  | 0 – 6 weeks     |                       | 6 weeks – 3 months |                       | 3 – 6 months    |                       | 6 months – 1 year |                       | 1 – 2 years     |                       | 2 – 3 years     |                       |
|----------------------------------|-----------------|-----------------------|--------------------|-----------------------|-----------------|-----------------------|-------------------|-----------------------|-----------------|-----------------------|-----------------|-----------------------|
|                                  | Treat-to-target | High-intensity statin | Treat-to-target    | High-intensity statin | Treat-to-target | High-intensity statin | Treat-to-target   | High-intensity statin | Treat-to-target | High-intensity statin | Treat-to-target | High-intensity statin |
| <b>No. of patients</b>           | <b>2200</b>     | <b>2200</b>           | <b>2187</b>        | <b>2187</b>           | <b>2182</b>     | <b>2184</b>           | <b>2177</b>       | <b>2182</b>           | <b>2164</b>     | <b>2166</b>           | <b>2137</b>     | <b>2138</b>           |
| <b>Statin therapy</b>            |                 |                       |                    |                       |                 |                       |                   |                       |                 |                       |                 |                       |
| <b>High-intensity statin</b>     |                 |                       |                    |                       |                 |                       |                   |                       |                 |                       |                 |                       |
| No. of patients                  | 1022            | 2176                  | 1116               | 2099                  | 1125            | 2080                  | 1144              | 2036                  | 1197            | 1975                  | 1194            | 1903                  |
| Atorvastatin 80 mg               | 3 (<1)          | 4 (<1)                | 8 (1)              | 7 (<1)                | 8 (1)           | 7 (<1)                | 8 (1)             | 7 (<1)                | 38 (3)          | 21 (1)                | 43 (4)          | 22 (1)                |
| Atorvastatin 40 mg               | 532 (52)        | 1079 (50)             | 586 (53)           | 1025 (49)             | 594 (52)        | 1016 (49)             | 601 (53)          | 1000 (49)             | 605 (51)        | 955 (48)              | 600 (50)        | 911 (48)              |
| Rosuvastatin 20 mg               | 487 (48)        | 1093 (50)             | 522 (47)           | 1067 (51)             | 523 (47)        | 1057 (51)             | 535 (47)          | 1029 (51)             | 554 (46)        | 999 (51)              | 551 (46)        | 970 (51)              |
| <b>Moderate-intensity statin</b> |                 |                       |                    |                       |                 |                       |                   |                       |                 |                       |                 |                       |
| No. of patients                  | 1173            | 24                    | 1047               | 70                    | 1019            | 76                    | 989               | 99                    | 900             | 143                   | 868             | 182                   |
| Atorvastatin 20 or 10 mg         | 557 (48)        | 14 (58)               | 481 (46)           | 36 (51)               | 461 (45)        | 38 (50)               | 442 (44)          | 49 (49)               | 387 (43)        | 67 (47)               | 362 (42)        | 79 (43)               |
| Rosuvastatin 10 or 5 mg          | 615 (52)        | 9 (38)                | 561 (53)           | 28 (40)               | 554 (54)        | 33 (44)               | 541 (55)          | 47 (47)               | 504 (56)        | 65 (45)               | 498 (57)        | 89 (49)               |
| Simvastatin 40 or 20 mg          | 1 (<1)          | 0                     | 3 (<1)             | 0                     | 2 (<1)          | 0                     | 4 (<1)            | 0                     | 5 (1)           | 1 (1)                 | 0               | 0                     |
| Pitavastatin 4, 2 or 1 mg        | 0               | 1 (<)                 | 1 (<1)             | 4 (6)                 | 1 (<1)          | 3 (4)                 | 1 (<1)            | 1 (1)                 | 3 (<1)          | 9 (6)                 | 7 (1)           | 13 (7)                |
| Fluvastatin XL 80 mg             | 0               | 0                     | 0                  | 2 (3)                 | 0               | 2 (3)                 | 0                 | 2 (2)                 | 1 (<1)          | 1 (1)                 | 1 (<1)          | 1 (1)                 |
| Pravastatin 40 mg                | 0               | 0                     | 1 (<1)             | 0                     | 1 (<1)          | 0                     | 1 (<1)            | 0                     | 0               | 0                     | 0               | 0                     |
| <b>Low-intensity statin</b>      |                 |                       |                    |                       |                 |                       |                   |                       |                 |                       |                 |                       |
| No. of patients                  | 5               | 0                     | 10                 | 2                     | 13              | 3                     | 14                | 4                     | 25              | 4                     | 26              | 3                     |
| Simvastatin 10 mg                | 1 (20)          | 0                     | 2 (20)             | 1 (50)                | 2 (15)          | 2 (67)                | 1 (7)             | 2 (50)                | 0               | 2 (50)                | 0               | 0                     |
| Rosuvastatin 2.5 mg              | 2 (40)          | 0                     | 2 (20)             | 0                     | 2 (15)          | 0                     | 2 (14)            | 0                     | 4 (16)          | 0                     | 3 (12)          | 1 (33)                |
| Atorvastatin 5 mg                | 2 (40)          | 0                     | 4 (40)             | 1 (50)                | 7 (54)          | 1 (33)                | 9 (64)            | 2 (50)                | 19 (76)         | 2 (50)                | 20 (77)         | 2 (67)                |
| Pravastatin 20 or 10 mg          | 0               | 0                     | 2 (20)             | 0                     | 2 (15)          | 0                     | 2 (14)            | 0                     | 2 (8)           | 0                     | 3 (12)          | 0                     |
| <b>Discontinuation of statin</b> |                 |                       |                    |                       |                 |                       |                   |                       |                 |                       |                 |                       |
| No. of patients                  | 0               | 0                     | 14                 | 16                    | 25              | 25                    | 30                | 43                    | 42              | 44                    | 50              | 49                    |
| <b>Non-statin therapy</b>        |                 |                       |                    |                       |                 |                       |                   |                       |                 |                       |                 |                       |
| <b>Ezetimibe</b>                 | 21 (1)          | 10 (1)                | 155 (7)            | 79 (4)                | 163 (8)         | 95 (4)                | 242 (11)          | 123 (6)               | 336 (16)        | 158 (7)               | 422 (20)        | 232 (11)              |
| Ezetimibe only without statin    | 0               | 0                     |                    |                       | 1               |                       | 3                 | 0                     | 1               | 1                     | 1               | 2                     |
| With low-intensity statin        | 1               | 0                     | 2                  | 1                     | 2               | 2                     | 1                 | 2                     | 0               | 2                     |                 |                       |
| With moderate-intensity statin   | 6               | 0                     | 13                 | 3                     | 17              | 7                     | 22                | 11                    | 35              | 28                    | 56              | 46                    |
| With high-intensity statin       | 14              | 10                    | 140                | 75                    | 143             | 86                    | 216               | 110                   | 300             | 127                   | 365             | 184                   |

Data are numbers (percentages).

© 2023 American Medical Association. All rights reserved.

**eTable 5. Cardiovascular medications**

|                         | 0 – 6 weeks     |                       | 6 weeks – 3 months |                       | 3 – 6 months    |                       | 6 months – 1 year |                       | 1 – 2 years     |                       | 2 – 3 years     |                       |
|-------------------------|-----------------|-----------------------|--------------------|-----------------------|-----------------|-----------------------|-------------------|-----------------------|-----------------|-----------------------|-----------------|-----------------------|
|                         | Treat-to-target | High-intensity statin | Treat-to-target    | High-intensity statin | Treat-to-target | High-intensity statin | Treat-to-target   | High-intensity statin | Treat-to-target | High-intensity statin | Treat-to-target | High-intensity statin |
| <b>No. of patients</b>  | <b>2200</b>     | <b>2200</b>           | <b>2187</b>        | <b>2187</b>           | <b>2182</b>     | <b>2184</b>           | <b>2177</b>       | <b>2182</b>           | <b>2164</b>     | <b>2166</b>           | <b>2137</b>     | <b>2138</b>           |
| Aspirin                 | 1592 (72)       | 1625 (74)             | 1548 (71)          | 1582 (72)             | 1527 (70)       | 1561 (72)             | 1494 (69)         | 1522 (70)             | 1344 (62)       | 1372 (63)             | 1242 (58)       | 1247 (58)             |
| Clopidogrel             | 1049 (48)       | 1029 (47)             | 1041 (48)          | 1022 (47)             | 1040 (48)       | 1017 (47)             | 1019 (47)         | 1033 (46)             | 1066 (49)       | 1035 (48)             | 1057 (50)       | 1030 (48)             |
| Prasugrel or Ticagrelor | 153 (7)         | 168 (8)               | 142 (7)            | 154 (7)               | 135 (6)         | 144 (7)               | 125 (6)           | 126 (6)               | 44 (2)          | 44 (2)                | 17 (1)          | 16 (1)                |
| Warfarin                | 15 (1)          | 12 (1)                | 16 (1)             | 13 (1)                | 15 (1)          | 13 (1)                | 14 (1)            | 14 (1)                | 17 (1)          | 15 (1)                | 15 (1)          | 12 (1)                |
| New oral anticoagulant  | 40 (2)          | 49 (2)                | 42 (2)             | 49 (2)                | 48 (2)          | 49 (2)                | 56 (3)            | 56 (3)                | 57 (3)          | 56 (3)                | 64 (3)          | 73 (3)                |
| Beta-blocker            | 1227 (56)       | 1209 (55)             | 1225 (56)          | 1214 (56)             | 1229 (56)       | 1210 (55)             | 1220 (56)         | 1205 (55)             | 1187 (55)       | 1175 (54)             | 1158 (54)       | 1150 (54)             |
| ACE inhibitor or ARB    | 1220 (56)       | 1213 (55)             | 1207 (55)          | 1226 (56)             | 1211 (56)       | 1226 (56)             | 1195 (55)         | 1218 (56)             | 1189 (55)       | 1198 (55)             | 1182 (55)       | 1205 (56)             |
| Calcium channel blocker | 134 (6)         | 145 (7)               | 133 (6)            | 136 (6)               | 139 (6)         | 132 (6)               | 141 (7)           | 136 (6)               | 132 (6)         | 128 (6)               | 140 (7)         | 128 (6)               |
| Thiazide                | 134 (6)         | 145 (7)               | 133 (6)            | 136 (6)               | 139 (6)         | 132 (6)               | 141 (7)           | 136 (6)               | 132 (6)         | 128 (6)               | 140 (7)         | 128 (6)               |
| Loop diuretics          | 126 (6)         | 131 (6)               | 123 (6)            | 122 (6)               | 116 (5)         | 128 (6)               | 111 (5)           | 121 (6)               | 110 (5)         | 112 (5)               | 105 (5)         | 113 (5)               |
| Spirolactone            | 55 (3)          | 63 (3)                | 51 (2)             | 59 (3)                | 49 (2)          | 59 (3)                | 47 (2)            | 54 (3)                | 39 (2)          | 54 (3)                | 44 (2)          | 53 (3)                |

Data are numbers (percentages).

Abbreviations: ACE, angiotensin-converting enzyme; ARB, angiotensin II receptor blocker.

**eTable 6. Serial changes in lipid profiles**

|                                 | <b>Treat-to-target</b> | <b>High-intensity statin</b> | <b>Absolute Difference (95% confidence interval)</b> | <b>P Value</b> |
|---------------------------------|------------------------|------------------------------|------------------------------------------------------|----------------|
| Lipid profile, mean (SD), mg/dl |                        |                              |                                                      |                |
| At 6 weeks                      |                        |                              |                                                      |                |
| No. of patients                 | 1598                   | 1601                         |                                                      |                |
| LDL-C                           | 69.6 (21.2)            | 66.8 (21.8)                  | 2.8 (1.3 to 4.3)                                     | <.001          |
| Total-C                         | 136.1 (26.7)           | 135.9 (28.1)                 | 0.1 (-1.8 to 2.0)                                    | .91            |
| Triglyceride                    | 127.1 (65.0)           | 127.3 (67.5)                 | -0.2 (-4.8 to 4.4)                                   | .95            |
| HDL-C                           | 47.2 (11.5)            | 47.4 (11.5)                  | -0.1 (-0.9 to 0.7)                                   | .78            |
| At 3 months                     |                        |                              |                                                      |                |
| No. of patients                 | 441                    | 397                          |                                                      |                |
| LDL-C                           | 67.3 (21.1)            | 65.1 (24.0)                  | 2.2 (-0.8 to 5.3)                                    | .16            |
| Total-C                         | 135.9 (27.8)           | 135.4 (29.8)                 | 0.6 (-3.1 to 4.3)                                    | .76            |
| Triglyceride                    | 133.8 (85.3)           | 143.6 (106.2)                | -9.8 (-22.9 to 3.3)                                  | .14            |
| HDL-C                           | 46.4 (12.4)            | 45.8 (11.7)                  | 0.6 (-1.0 to 2.3)                                    | .46            |
| At 6 months                     |                        |                              |                                                      |                |
| No. of patients                 | 1074                   | 1092                         |                                                      |                |
| LDL-C                           | 68.2 (20.3)            | 67.9 (22.8)                  | 0.3 (-1.5 to 2.1)                                    | .76            |
| Total-C                         | 137.8 (26.9)           | 137.6 (29.2)                 | 0.2 (-2.1 to 2.5)                                    | .87            |
| Triglyceride                    | 131.6 (72.6)           | 128.8 (72.2)                 | 2.8 (-3.3 to 9.0)                                    | .37            |
| HDL-C                           | 47.4 (12.0)            | 47.5 (11.5)                  | -0.1 (-1.1 to 0.9)                                   | .84            |
| At 1 year                       |                        |                              |                                                      |                |
| No. of patients                 | 1862                   | 1854                         |                                                      |                |
| LDL-C                           | 69.3 (20.6)            | 68.5 (22.7)                  | 0.8 (-0.6 to 2.2)                                    | .28            |
| Total-C                         | 137.1 (27.4)           | 136.7 (27.4)                 | 0.3 (-1.4 to 2.1)                                    | .72            |
| Triglyceride                    | 132.0 (78.8)           | 130.4 (75.4)                 | 1.6 (-3.4 to 6.5)                                    | .54            |
| HDL-C                           | 47.8 (11.8)            | 47.6 (11.9)                  | 0.2 (-0.6 to 1.0)                                    | .59            |
| At 2 years                      |                        |                              |                                                      |                |
| No. of patients                 | 1654                   | 1679                         |                                                      |                |
| LDL-C                           | 66.8 (19.5)            | 67.1 (22.5)                  | -0.3 (-1.7 to 1.1)                                   | .66            |
| Total-C                         | 136.3 (26.3)           | 135.7 (26.5)                 | 0.6 (-1.2 to 2.4)                                    | .49            |
| Triglyceride                    | 128.9 (72)             | 125.3 (71.3)                 | 3.6 (-1.3 to 8.5)                                    | .15            |
| HDL-C                           | 47.6 (11.6)            | 47.1 (11.8)                  | 0.5 (-0.3 to 1.3)                                    | .19            |
| At 3 years                      |                        |                              |                                                      |                |
| No. of patients                 | 1560                   | 1554                         |                                                      |                |
| LDL-C                           | 67.6 (21.2)            | 67.5 (23.0)                  | 0.1 (-1.5 to 1.6)                                    | .93            |
| Total-C                         | 135.2 (26.7)           | 136.4 (27.1)                 | -1.2 (-3.1 to 0.7)                                   | .21            |
| Triglyceride                    | 128.3 (73.1)           | 126.9 (81.3)                 | 1.5 (-4 to 6.9)                                      | .60            |
| HDL-C                           | 46.3 (11.5)            | 47.0 (11.5)                  | -0.7 (-1.5 to 0.1)                                   | .10            |

Data are numbers (percentages).

Abbreviations: HDL-C, high-density lipoprotein cholesterol; LDL-C, low-density lipoprotein cholesterol; Total-C, total cholesterol.



**eTable 7. Patients with LDL-C below 70 mg/dL**

|                  | <b>Treat-to-target</b> | <b>High-intensity statin</b> | <b>Absolute Difference (95% confidence interval)</b> | <b>P Value</b> |
|------------------|------------------------|------------------------------|------------------------------------------------------|----------------|
| At randomization | 712/2200 (32.4)        | 655/2200 (29.8)              | 2.6 (-0.1 to 5.3)                                    | .06            |
| At 6 weeks       | 890/1598 (55.7)        | 987/1601 (61.6)              | -6.0 (-9.4 to -2.5)                                  | <.001          |
| At 3 months      | 261/441 (59.2)         | 267/397 (67.3)               | -8.1 (-15.6 to -5.3)                                 | .02            |
| At 6 months      | 620/1074 (57.7)        | 653/1092 (59.8)              | -2.1 (-5.8 to 1.7)                                   | .33            |
| At 1 year        | 1038/1862 (55.7)       | 1092/1854 (58.9)             | -3.2 (-6.3 to 0.0)                                   | .05            |
| At 2 years       | 1005/1654 (60.8)       | 1015/1679 (60.4)             | 0.3 (-3.0 to 3.6)                                    | .86            |
| At 3 years       | 908/1560 (58.2)        | 927/1554 (59.7)              | -1.4 (-4.9 to 2.0)                                   | .41            |

Data are presented as number of patients / total number of patients (percentages).

Abbreviations: LDL-C, low-density lipoprotein cholesterol.

**eTable 8. Patients excluded from the per-protocol population**

|                                                                                                        | <b>Treat-to-target<br/>(n=92)</b> | <b>High-intensity<br/>statin (n=94)</b> |
|--------------------------------------------------------------------------------------------------------|-----------------------------------|-----------------------------------------|
| Discontinuation of statin therapy by patient's poor compliance                                         | 13                                | 5                                       |
| Did not undergo up-titration despite non-achievement of the goal in the treat-to-target strategy group |                                   |                                         |
| Patient choice                                                                                         | 34                                |                                         |
| Physician choice                                                                                       | 14                                |                                         |
| Failure to comply with protocol                                                                        | 22                                |                                         |
| Other                                                                                                  | 9                                 |                                         |
| Did not maintain high-intensity statin in the high-intensity statin strategy group                     |                                   |                                         |
| Patient choice                                                                                         |                                   | 48                                      |
| Physician choice                                                                                       |                                   | 26                                      |
| Failure to comply with protocol                                                                        |                                   | 5                                       |
| Other                                                                                                  |                                   | 10                                      |

Data are presented as number of patients.

**eTable 9. Primary and secondary endpoints in the per-protocol population<sup>a</sup>**

| Outcome                                                                                                                         | Treat-to-target<br>(N=2108) | High-intensity<br>statin<br>(N=2106) | Difference<br>(95% CI) <sup>b</sup> | P Value            |
|---------------------------------------------------------------------------------------------------------------------------------|-----------------------------|--------------------------------------|-------------------------------------|--------------------|
|                                                                                                                                 | <i>no. of patients (%)</i>  |                                      | <i>percentage points</i>            |                    |
| <b>Primary endpoint</b>                                                                                                         |                             |                                      |                                     |                    |
| Death, myocardial infarction, stroke, or coronary revascularization                                                             | 173 (8.3)                   | 177 (8.5)                            | -0.2 (-∞ to 1.5) <sup>c</sup>       | <.001 <sup>d</sup> |
| <b>Components of primary endpoint</b>                                                                                           |                             |                                      |                                     |                    |
| Death                                                                                                                           | 54 (2.6)                    | 49 (2.3)                             | 0.3 (-0.7 to 1.2)                   | .61                |
| Cardiac death                                                                                                                   | 16                          | 12                                   |                                     |                    |
| Myocardial infarction                                                                                                           | 34 (1.6)                    | 24 (1.1)                             | 0.5 (-0.2 to 1.3)                   | .14                |
| Stroke                                                                                                                          | 16 (0.8)                    | 26 (1.3)                             | -0.5 (-1.1 to 0.1)                  | .12                |
| Ischemic stroke                                                                                                                 | 11                          | 19                                   |                                     |                    |
| Hemorrhagic stroke                                                                                                              | 5                           | 7                                    |                                     |                    |
| Coronary revascularization <sup>e</sup>                                                                                         | 109 (5.3)                   | 107 (5.2)                            | 0.1 (-1.3 to 1.5)                   | .89                |
| <b>Secondary endpoints</b>                                                                                                      |                             |                                      |                                     |                    |
| New-onset diabetes mellitus                                                                                                     | 116 (5.6)                   | 145 (7.0)                            | -1.4 (-2.9 to 0.1)                  | .07                |
| Initiation of anti-diabetic medication                                                                                          | 70                          | 102                                  |                                     |                    |
| Cataract operation                                                                                                              | 42 (2.0)                    | 41 (2.0)                             | 0.1 (-0.8 to 0.9)                   | .90                |
| Discontinuation of statin therapy                                                                                               | 31 (1.5)                    | 46 (2.3)                             | -0.7 (-1.6 to 0.1)                  | .09                |
| Composite of laboratory abnormalities <sup>f</sup>                                                                              | 17 (0.8)                    | 22 (1.1)                             | -0.2 (-0.8 to 0.4)                  | .43                |
| Aminotransferase elevation                                                                                                      | 7                           | 8                                    |                                     |                    |
| Creatine kinase elevation                                                                                                       | 3                           | 6                                    |                                     |                    |
| Creatinine elevation                                                                                                            | 7                           | 8                                    |                                     |                    |
| Peripheral artery revascularization                                                                                             | 12 (0.6)                    | 16 (0.8)                             | -0.2 (-0.7 to 0.3)                  | .45                |
| Hospitalization due to heart failure                                                                                            | 13 (0.6)                    | 5 (0.2)                              | 0.4 (-0.0 to 0.8)                   | .06                |
| End-stage kidney disease                                                                                                        | 3 (0.1)                     | 7 (0.3)                              | -0.2 (-0.5 to 0.1)                  | .21                |
| Deep vein thrombosis or pulmonary embolism                                                                                      | 4 (0.2)                     | 5 (0.2)                              | <0.1 (-0.3 to 0.2)                  | .74                |
| Deep vein thrombosis                                                                                                            | 2                           | 5                                    |                                     |                    |
| Pulmonary embolism                                                                                                              | 3                           | 0                                    |                                     |                    |
| Aortic intervention or surgery                                                                                                  | 2 (0.1)                     | 3 (0.1)                              | NR                                  |                    |
| Endovascular therapy                                                                                                            | 1                           | 2                                    |                                     |                    |
| Surgical therapy                                                                                                                | 1                           | 1                                    |                                     |                    |
| Composite of new-onset diabetes mellitus, aminotransferase or creatine kinase elevation, or end-stage kidney disease (post hoc) | 126 (6.1)                   | 165 (8.0)                            | -1.9 (-3.4 to -0.4)                 | .015               |

<sup>a</sup> The listed percentages were estimated using the Kaplan-Meier method, so the values might not calculate mathematically. Differences in event rates are not reported (NR) for aortic intervention because of the low numbers of events.

<sup>b</sup> The between-group difference was measured in the treat-to-target group compared with the high-intensity statin group. The widths of the confidence intervals have not been adjusted for multiplicity and cannot be used to infer treatment effects.

<sup>c</sup> A 1-sided 97.5% CI was calculated for the primary end point.

<sup>d</sup> The P value for noninferiority is for the upper boundary of the 97.5% confidence interval of the between-group difference in primary endpoint, which was 1.5 percentage points. Other P values were two-sided.

<sup>e</sup> All coronary revascularizations were clinically indicated: an invasive angiographic percent diameter stenosis  $\geq 50\%$  with ischemic symptoms or signs, or  $\geq 70\%$  even without symptoms or signs.

<sup>f</sup> Aminotransferase elevation was defined as  $>$ baseline level and  $>3$  times the upper limit of reference; creatine kinase elevation was defined as  $>$ baseline level and  $>5$  times the upper limit of reference; creatinine level elevation was defined as  $>50\%$  increase from baseline and greater than the upper limit of reference. Reference values may vary based on lab and location.

**eTable 10. Reasons for discontinuing statin therapy by adverse effect**

|                                  | <b>Treat-to-target<br/>(n=31)</b> | <b>High-intensity statin<br/>(n=46)</b> |
|----------------------------------|-----------------------------------|-----------------------------------------|
| General weakness                 | 9 (29)                            | 17 (37)                                 |
| Gastrointestinal symptoms        | 9 (29)                            | 9 (20)                                  |
| Muscle symptoms                  | 5 (16)                            | 9 (20)                                  |
| Itching or urticaria             | 1 (3)                             | 1 (2)                                   |
| Dizziness or peripheral numbness | 2 (4)                             | 2 (4)                                   |
| Creatine kinase elevation        | 1 (3)                             | 5 (11)                                  |
| Liver enzyme elevation           | 1 (3)                             | 1 (2)                                   |
| Other                            | 3 (10)                            | 2 (4)                                   |

Data are numbers (percentages).

**eFigure 1. Lipid profiles during study period**

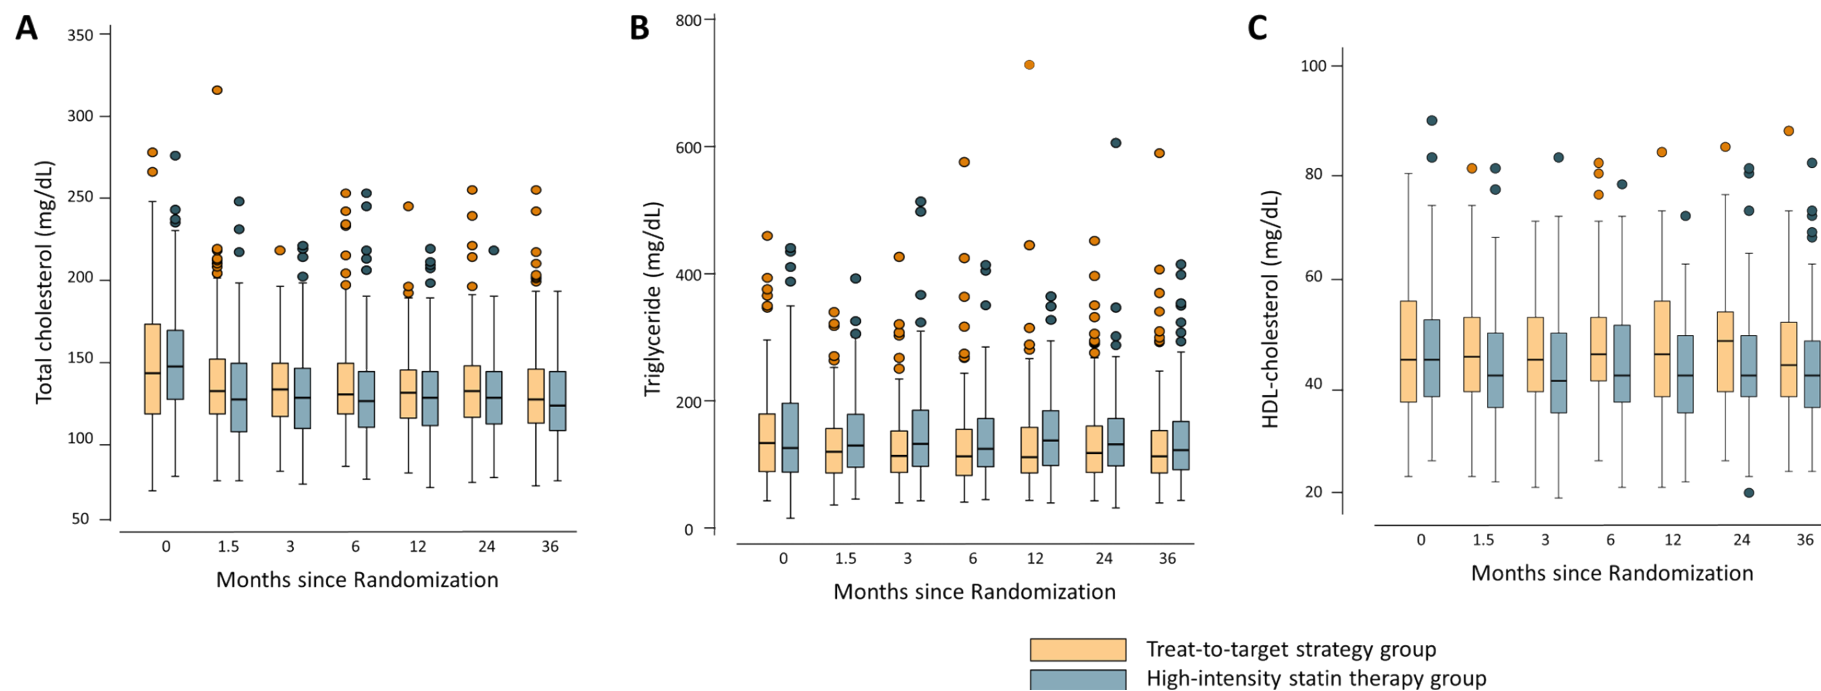

Box plots are shown in which the middle line represents the median value, boxes represent the interquartile range, whiskers extend to the most extreme observed values with  $1.5 \times$  the interquartile range of the nearer quartile, and dots represent observed values outside that range. Reference values may vary based on lab and location. HDL indicates high-density lipoprotein.

**eFigure 2. Treatment difference for the primary endpoint**

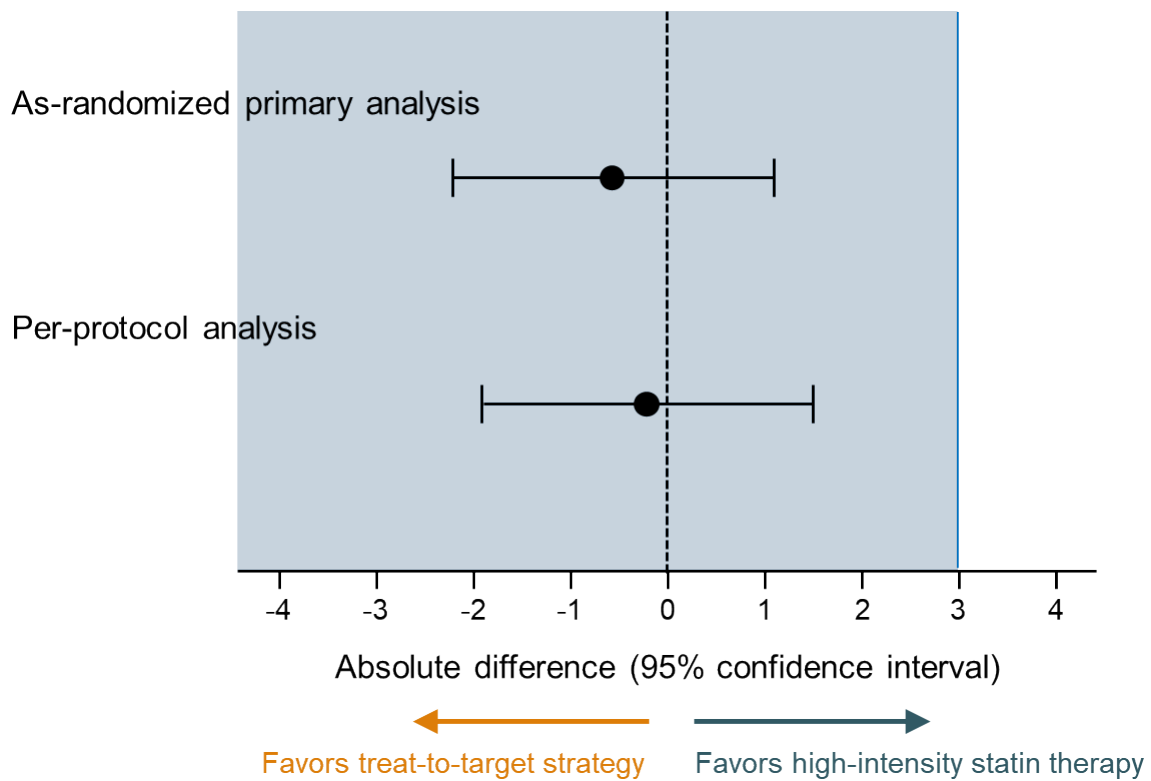

The vertical blue line indicates the absolute difference of 3.0 percentage points prespecified as the non-inferiority margin; the blue tinted region to the left of the absolute difference of 3.0 percentage points indicates values for which a treat-to-target strategy would be considered noninferior to a high-intensity statin therapy.

**eFigure 3. Subgroup analyses for the primary endpoint.**

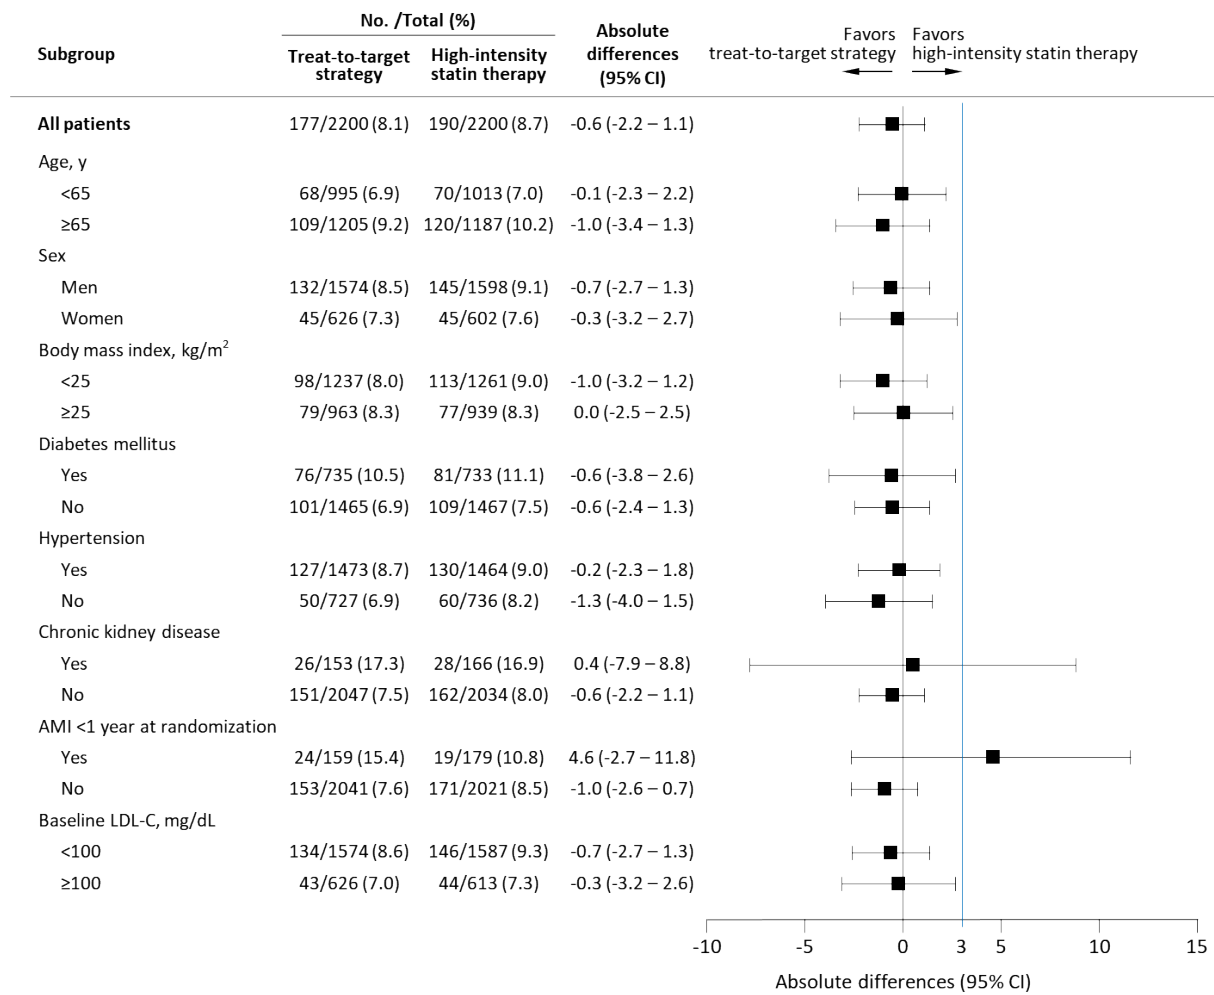

Results showing the absolute differences in the primary endpoint (death, myocardial infarction, stroke, or coronary revascularization) in prespecified subgroups of patients who received the target-to-treat strategy or high-intensity statin therapy for statin intensity. The vertical blue line indicates the absolute difference of 3.0 percentage points prespecified as the non-inferiority margin. AMI indicates acute myocardial infarction; CI, confidence interval; LDL-C, low-density lipoprotein cholesterol.
