# Supplementary material
Source: PubMed Central journal article supplement (PMC9989958)
Supplement: jama-e232487-s003.pdf [file jama-e232487-s003.pdf]

| <b>*Group Name(s): LODESTAR investigators</b> |                   |                              |                         |                                                                      |                                                 |                                                                                                                                                                        |
|-----------------------------------------------|-------------------|------------------------------|-------------------------|----------------------------------------------------------------------|-------------------------------------------------|------------------------------------------------------------------------------------------------------------------------------------------------------------------------|
| <b>*First Name and Middle Initial(s)</b>      | <b>*Last Name</b> | <b>*Suffix (eg, Jr, III)</b> | <b>Academic Degrees</b> | <b>Institution</b>                                                   | <b>Location (city, state/province, country)</b> | <b>Role or Contribution, eg, chair, principal investigator</b>                                                                                                         |
| Myeong-Ki                                     | Hong              |                              | MD                      | Severance Hospital, Yonsei University College of Medicine            | Seoul, Korea                                    | Data acquisition, analysis, interpretation of data, critical revision of manuscript, enrollment of participants and PI of this trial                                   |
| Donghoon                                      | Choi              |                              | MD                      | Severance Hospital, Yonsei University College of Medicine            | Seoul, Korea                                    | Data acquisition, analysis, interpretation of data, critical revision of manuscript, enrollment of participants                                                        |
| Young-Guk                                     | Ko                |                              | MD                      | Severance Hospital, Yonsei University College of Medicine            | Seoul, Korea                                    | Data acquisition, analysis, interpretation of data, critical revision of manuscript, enrollment of participants                                                        |
| Byeong-Keuk                                   | Kim               |                              | MD                      | Severance Hospital, Yonsei University College of Medicine            | Seoul, Korea                                    | Data acquisition, analysis, interpretation of data, critical revision of manuscript, enrollment of participants                                                        |
| Jung-Sun                                      | Kim               |                              | MD                      | Severance Hospital, Yonsei University College of Medicine            | Seoul, Korea                                    | Data acquisition, analysis, interpretation of data, critical revision of manuscript, enrollment of participants                                                        |
| Chul-Min                                      | Ahn               |                              | MD                      | Severance Hospital, Yonsei University College of Medicine            | Seoul, Korea                                    | Data acquisition, analysis, interpretation of data, critical revision of manuscript, enrollment of participants                                                        |
| Sung-Jin                                      | Hong              |                              | MD                      | Severance Hospital, Yonsei University College of Medicine            | Seoul, Korea                                    | Data acquisition, analysis, interpretation of data, critical revision of manuscript, enrollment of participants, draft of manuscript, 1st author, statistical analysis |
| Seung-Jun                                     | Lee               |                              | MD                      | Severance Hospital, Yonsei University College of Medicine            | Seoul, Korea                                    | Data acquisition, analysis, interpretation of data, critical revision of manuscript, enrollment of participants                                                        |
| Yong-Joon                                     | Lee               |                              | MD                      | Severance Hospital, Yonsei University College of Medicine            | Seoul, Korea                                    | Data acquisition, analysis, interpretation of data, critical revision of manuscript, enrollment of participants, draft of manuscript, 1st author, statistical analysis |
| Bum-Kee                                       | Hong              |                              | MD                      | Gangnam Severance Hospital                                           | Seoul, Korea                                    | Data acquisition, analysis, interpretation of data, critical revision of manuscript, enrollment of participants                                                        |
| Hyuck Moon                                    | Kwon              |                              | MD                      | Gangnam Severance Hospital                                           | Seoul, Korea                                    | Enrollment of participants                                                                                                                                             |
| Jong-Youn                                     | Kim               |                              | MD                      | Gangnam Severance Hospital                                           | Seoul, Korea                                    | Enrollment of participants                                                                                                                                             |
| Pil Ki                                        | Min               |                              | MD                      | Gangnam Severance Hospital                                           | Seoul, Korea                                    | Enrollment of participants                                                                                                                                             |
| Young Won                                     | Yoon              |                              | MD                      | Gangnam Severance Hospital                                           | Seoul, Korea                                    | Enrollment of participants                                                                                                                                             |
| Byoung Kwon                                   | Lee               |                              | MD                      | Gangnam Severance Hospital                                           | Seoul, Korea                                    | Enrollment of participants                                                                                                                                             |
| Se-Joong                                      | Rim               |                              | MD                      | Gangnam Severance Hospital                                           | Seoul, Korea                                    | Enrollment of participants                                                                                                                                             |
| Eui-Young                                     | Choi              |                              | MD                      | Gangnam Severance Hospital                                           | Seoul, Korea                                    | Enrollment of participants                                                                                                                                             |
| Woong Chol                                    | Kang              |                              | MD                      | Gachon University College of Medicine                                | Incheon, Korea                                  | Data acquisition, analysis, interpretation of data, critical revision of manuscript, enrollment of participants                                                        |
| Pyung Chun                                    | Oh                |                              | MD                      | Gachon University College of Medicine                                | Incheon, Korea                                  | Enrollment of participants                                                                                                                                             |
| Jong-Young                                    | Lee               |                              | MD                      | Kangbuk Samsung Hospital, Sungkyunkwan University School of Medicine | Seoul, Korea                                    | Data acquisition, analysis, interpretation of data, critical revision of manuscript, enrollment of participants                                                        |
| Jin-Bae                                       | Lee               |                              | MD                      | Daegu Catholic University Medical Center                             | Daegu, Korea                                    | Data acquisition, analysis, interpretation of data, critical revision of manuscript, enrollment of participants                                                        |
| Kee Sik                                       | Kim               |                              | MD                      | Daegu Catholic University Medical Center                             | Daegu, Korea                                    | Enrollment of participants                                                                                                                                             |

## Supplemental Online Content: Nonauthor Collaborators

\*First name, last name, and suffix (if applicable) are required and will appear in PubMed.

| *First Name and Middle Initial(s) | *Last Name | *Suffix (eg, Jr, III) | Academic Degrees | Institution                                              | Location (city, state/province, country) | Role or Contribution, eg, chair, principal investigator                                                         |
|-----------------------------------|------------|-----------------------|------------------|----------------------------------------------------------|------------------------------------------|-----------------------------------------------------------------------------------------------------------------|
| Ji Yong                           | Choi       |                       | MD               | Daegu Catholic University Medical Center                 | Daegu, Korea                             | Enrollment of participants                                                                                      |
| Jae Kean                          | Ryu        |                       | MD               | Daegu Catholic University Medical Center                 | Daegu, Korea                             | Enrollment of participants                                                                                      |
| Seung Pyo                         | Hong       |                       | MD               | Daegu Catholic University Medical Center                 | Daegu, Korea                             | Enrollment of participants                                                                                      |
| Chang Yeon                        | Kim        |                       | MD               | Daegu Catholic University Medical Center                 | Daegu, Korea                             | Enrollment of participants                                                                                      |
| Tae-Hyun                          | Yang       |                       | MD               | Inje University Busan Paik Hospital                      | Busan, Korea                             | Data acquisition, analysis, interpretation of data, critical revision of manuscript, enrollment of participants |
| Hyung-Jin                         | Cho        |                       | MD               | Inje University Busan Paik Hospital                      | Busan, Korea                             | Enrollment of participants                                                                                      |
| Junghan                           | Yoon       |                       | MD               | Wonju Severance Christian Hospital                       | Wonju, Korea                             | Data acquisition, analysis, interpretation of data, critical revision of manuscript, enrollment of participants |
| Min-Soo                           | Ahn        |                       | MD               | Wonju Severance Christian Hospital                       | Wonju, Korea                             | Enrollment of participants                                                                                      |
| Sung Gyun                         | Ahn        |                       | MD               | Wonju Severance Christian Hospital                       | Wonju, Korea                             | Enrollment of participants                                                                                      |
| Jun-Won                           | Lee        |                       | MD               | Wonju Severance Christian Hospital                       | Wonju, Korea                             | Enrollment of participants                                                                                      |
| Jung-Woo                          | Son        |                       | MD               | Wonju Severance Christian Hospital                       | Wonju, Korea                             | Enrollment of participants                                                                                      |
| Yangsoo                           | Jang       |                       | MD               | CHA University College of Medicine                       | Seongnam, Korea                          | Data acquisition, analysis, interpretation of data, critical revision of manuscript, enrollment of participants |
| Hyuck-Jun                         | Yoon       |                       | MD               | Keimyung University Dongsan Medical Center               | Daegu, Korea                             | Enrollment of participants                                                                                      |
| Cheol Hyun                        | Lee        |                       | MD               | Keimyung University Dongsan Medical Center               | Daegu, Korea                             | Enrollment of participants                                                                                      |
| Jongmin                           | Hwang      |                       | MD               | Keimyung University Dongsan Medical Center               | Daegu, Korea                             | Enrollment of participants                                                                                      |
| Yun-Kyeong                        | Cho        |                       | MD               | Keimyung University Dongsan Medical Center               | Daegu, Korea                             | Enrollment of participants                                                                                      |
| Seung-Ho                          | Hur        |                       | MD               | Keimyung University Dongsan Medical Center               | Daegu, Korea                             | Enrollment of participants                                                                                      |
| Seongwook                         | Han        |                       | MD               | Keimyung University Dongsan Medical Center               | Daegu, Korea                             | Enrollment of participants                                                                                      |
| Chang-Wook                        | Nam        |                       | MD               | Keimyung University Dongsan Medical Center               | Daegu, Korea                             | Enrollment of participants                                                                                      |
| Hyoungseop                        | Kim        |                       | MD               | Keimyung University Dongsan Medical Center               | Daegu, Korea                             | Enrollment of participants                                                                                      |
| Hyoung-Seob                       | Park       |                       | MD               | Keimyung University Dongsan Medical Center               | Daegu, Korea                             | Enrollment of participants                                                                                      |
| In-Cheol                          | Kim        |                       | MD               | Keimyung University Dongsan Medical Center               | Daegu, Korea                             | Enrollment of participants                                                                                      |
| Yun-Hyeong                        | Cho        |                       | MD               | Myongji Hospital, Hanyang University College of Medicine | Goyang, Korea                            | Enrollment of participants                                                                                      |
| Hyeon-Ju                          | Jeong      |                       | MD               | Myongji Hospital, Hanyang University College of Medicine | Goyang, Korea                            | Enrollment of participants                                                                                      |
| Jin-Ho                            | Kim        |                       | MD               | Myongji Hospital, Hanyang University College of Medicine | Goyang, Korea                            | Enrollment of participants                                                                                      |
| Chewan                            | Lim        |                       | MD               | Myongji Hospital, Hanyang University College of Medicine | Goyang, Korea                            | Enrollment of participants                                                                                      |
| Yongsung                          | Suh        |                       | MD               | Myongji Hospital, Hanyang University College of Medicine | Goyang, Korea                            | Enrollment of participants                                                                                      |
| Eui Seok                          | Hwang      |                       | MD               | Myongji Hospital, Hanyang University College of Medicine | Goyang, Korea                            | Enrollment of participants                                                                                      |
| Ji Hyun                           | Lee        |                       | MD               | Myongji Hospital, Hanyang University College of Medicine | Goyang, Korea                            | Enrollment of participants                                                                                      |
| Sung Yun                          | Lee        |                       | MD               | Inje University Ilsan Paik Hospital                      | Ilsan, Korea                             | Enrollment of participants                                                                                      |
| Sung Uk                           | Kwon       |                       | MD               | Inje University Ilsan Paik Hospital                      | Ilsan, Korea                             | Enrollment of participants                                                                                      |

Supplemental Online Content: Nonauthor Collaborators

\*First name, last name, and suffix (if applicable) are required and will appear in PubMed.

| *First Name and Middle Initial(s) | *Last Name | *Suffix (eg, Jr, III) | Academic Degrees | Institution                       | Location (city, state/province, country) | Role or Contribution, eg, chair, principal investigator |
|-----------------------------------|------------|-----------------------|------------------|-----------------------------------|------------------------------------------|---------------------------------------------------------|
| Song-Yi                           | Kim        |                       | MD               | Jeju National University Hospital | Jeju, Korea                              | Enrollment of participants                              |
| Keun-Ho                           | Park       |                       | MD               | Chosun University Hospital        | Gwangju, Korea                           | Enrollment of participants                              |
| Hyun Kuk                          | Kim        |                       | MD               | Chosun University Hospital        | Gwangju, Korea                           | Enrollment of participants                              |
