# Supplementary material
Source: PubMed Central journal article supplement (PMC9989958)
Supplement: jama-e232487-s004.pdf [file jama-e232487-s004.pdf]

## **Data Sharing Statement**

Hong. Treat-to-Target or High-Intensity Statin in Patients With Coronary Artery Disease. *JAMA*.  
Published March 06, 2023. doi:10.1001/jama.2023.2487

### **Data**

**Data available:** No
